# Supplementary material
Source: PubMed Central journal article supplement (PMC2747889)
Supplement: supp_191_19_6020__1.pdf [file supp_191_19_6020__1.pdf]

## Supplementary Table 1

| <b>vector</b> | <b>content</b>                  | <b>construction</b>                                                                                                                                            |
|---------------|---------------------------------|----------------------------------------------------------------------------------------------------------------------------------------------------------------|
| pDG1662       | amyE::cm                        | Guerout-Fleury et al. 1996                                                                                                                                     |
| pKL147        | gfp                             | Lemon and Grossman 1998                                                                                                                                        |
| pDR111        | amyE::Pspank lacI spc           |                                                                                                                                                                |
| pDR160        | amyE::Pxyl xylR spc             |                                                                                                                                                                |
| pDG1730       | source of erm cassette for LFH  | Guerout-Fleury et al. 1996                                                                                                                                     |
| pMMB207       | Ptac, cm                        | Morales et al. 1991                                                                                                                                            |
| pEr::Sp       |                                 | Steinmetz and Richter 1994                                                                                                                                     |
| pAF074        | SpeI site added to pDG1662      |                                                                                                                                                                |
| pAF344        | yabM::cm, spc, amp              | made by inserting front flank (AFO646/647, PY79 gDNA) into pAF074 at BamHI/SpeI then ligating back flank yabM (AFO648/649, PY79 gDNA) digested with SalI/BglII |
| pAF320        | 3'spoVB-gfp spc, amp            | made by digesting 3'spoVB (AFO604/605, PY79 gDNA) with EcoRI/XhoI and ligating to pKL147 cut with same                                                         |
| pAF324        | 3'ytgP-gfp spc amp              | made by digesting 3'ytgP (AFO620/621, PY79 gDNA) with EcoRI/XhoI and ligating to pKL147 cut with same                                                          |
| pAF327        | 3'ykvU-gfp spc, amp             | made by digesting 3'ykvU (AFO628/629, PY79 gDNA) with EcoRI/XhoI and ligating to pKL147 cut with same                                                          |
| pAF326        | 3'yabM-gfp spc, amp             | made by digesting 3'yabM (AFO626/627, PY79 gDNA) with EcoRI/XhoI and ligating to pKL147 cut with same                                                          |
| pAF350        | amyE:Pspank-uppS spc, amp       | made by digesting uppS (AFO668/669, PY79 gDNA) with SalI/SphI and ligating to pDR111 cut with same                                                             |
| pAF351        | amyE:Pspank-uppS-flag spc, amp  | made by digesting uppS-flag (AFO668/670, PY79 gDNA) with SalI/SphI and ligating to pDR111 cut with same                                                        |
| pAF364        | amyE::Psweet-spoVB-gfp spc, amp | made by digesting spoVB-gfp (AFO696/JD643, JDB2329 gDNA) with NheI/BamHI and ligating to pDR160 cut with same                                                  |
| pAF371        | amyE::Psweet-mviN spc, amp      | made by digesting mviN (AFO711/712, MG1665 gDNA) with NheI/BamHI and ligating to pDR160 cut with same.                                                         |
| pAF374        | Ptac-ytgP-gfp cm                | Made by digesting ytgP-gfp(AFO713/JD643, JDB2356 gDNA) with EcoRI/BamHI and ligating to pMMB207                                                                |
| pAF375        | Ptac-spoVB-gfp cm               | Made by digesting spoVB-gfp (AFO714/JD643, JDB2329 gDNA) with EcoRI/BamHI and ligating to pMMB207                                                              |

## Supplementary Table 2

| Oligo  | 5'-3' sequence                                            |
|--------|-----------------------------------------------------------|
| AFO604 | gtc <u>gaattc</u> ctgcgatcagtgaagg                        |
| AFO605 | ctg <u>ctcga</u> tcggatgatcaaccgt                         |
| AFO606 | cagctcttttacgacaaattg                                     |
| AFO607 | actatcatatcttctttttggtttcttcatcaccattttc                  |
| AFO608 | aggtgtagcatgtctcattctgaactagatatgatgaaac                  |
| AFO609 | taaagtgttggtgcatataatgatct                                |
| AFO610 | acacaagccttttattacagctgtctg                               |
| AFO611 | GAACAAGATGGATTGCACGCAGgatgtctctccttgtctcttg               |
| AFO612 | CGGACGGGAAGTATCCAGCTtgataaaggaacagcaggggc                 |
| AFO613 | ttccttcgcttttagcaaatccgccg                                |
| AFO620 | gtc <u>gaattc</u> ctgttgctcgggatctc                       |
| AFO621 | ctg <u>ctcga</u> gcctgcatgtctgcct                         |
| AFO626 | gtc <u>gaattc</u> gctgggttgatttgca                        |
| AFO627 | ctg <u>ctcga</u> gcccgccattttgttc                         |
| AFO628 | gtc <u>gaattc</u> cgatcgatcaatacg                         |
| AFO629 | ctg <u>ctcga</u> tccttcaattcgcg                           |
| AFO646 | cta <u>actagt</u> gacaaatcggactgg                         |
| AFO647 | ctaggatccaggtaacgtcaggg                                   |
| AFO648 | gtcgg <u>tcgac</u> cacacttttggttccg                       |
| AFO649 | gtc <u>agatct</u> caaataatggcactg                         |
| AFO668 | gtaag <u>tcgac</u> gggtgacggaggaatc                       |
| AFO669 | ctt <u>gcatgc</u> ttaaattccgccaacc                        |
| AFO670 | ctt <u>gcatgc</u> TTATTTGTCGTCGTCGTTTATAGTcaattccgccaacc  |
| AFO696 | gtt <u>gctagc</u> cagtttgagaaggcag                        |
| AFO711 | gtc <u>gctagc</u> taaggaggtgatctagagatgaatttattaaaatcgc   |
| AFO712 | gac <u>ggatcc</u> ttacaccgtccggcgggcaaattc                |
| AFO713 | gtac <u>gaattc</u> gaaggagatatacatatgtcaagcaaactgttaag    |
| AFO714 | gct <u>agaattc</u> gaaggagatatacatatggcgaaacagacgtttttaag |
| JD643  | gtcgc <u>ggatcc</u> cctatttgatagttcatccatgc               |
